# Supplementary material for: Characterization of Trehalose-6-Phosphate Synthase and Trehalose-6-Phosphate Phosphatase Genes of Tomato (Solanum lycopersicum L.) and Analysis of Their Differential Expression in Response to Temperature
Source: MDPI journal article supplement (doi:10.3390/ijms231911436), 2022-09-28
Supplement: s1 [file s1]

**Mollavali and Börnke; Supplementary Figure S1.**

>pS1TPS2

GGTTGAGAACTGTCGAGATGTTAGCCGGACCAAAAAAGGAAATCAAGTAGACGTTTGTAGTTTCCTTAG  
CGCTCTTACGTTGACGGCCCAGTCCAATCCAACCTCAGTTTTAGCGGGCTGGAAAGACTTTAGAAGGGC  
CTCGAAAAGAGCATCTTACATAATTGTACAATTGATATACAATAATTATATACTATATTTATTATAT  
ATATGTATATACATATAAATATGTATTGTTTATATTTGAATAATACATGATACTTAACCTGGCATCCG  
CAAATTCATTTGAATGTGCACACACCCAAAATTAAAAATTAGAGTTGTCAACTGACATTAAGTTATT  
ATGCCTTTATATTTTCATAAAAGTTGTATATTTTAGATTGTGAATGCATGATGTAACATTCATGTATT  
TATGAAATGTAATATAGTTACTATATATATTAAGTGAGTAGATGAAAATAAGCTTTCATAATAATAGA  
CGAAAAGATTGAAAAGCTAAACCGTAAGATACATAATCTATCAAACCTTTCAGCGTATGAGATTCTT  
GGGAAAATTTGTGCATTTTTTATCCAAATTGAACAATATAATACATTGTTGAGAATATCTTTGAGCTAA  
AAGAACACAATTACTAATATTAAAGTCTAGGTTTAAACAGGAAGAATATGACGATGACAAATCATAGGA  
CTCGACGAAAAAACTAATTGCAAACGTCTATTGCTAAAAGATACTCGAGTGATGTGGTTATGACACAA  
TAAATTTTTTAAAAATCGACTCGTGGATTATGATAATGAGCCACATGAACTTAGTTCAAAGGGGTGA  
TTATTGTGTAGACAAACAGAATGTGACATTGAGTTAAAAGATTGAGAACTATACTAAAATACACGAT  
TTCTAAATGTTGTAAATTTTTTTATTTCAAAAAATATTTACGCTTTATCCAAAACAAACAATATCATA  
CTTTATTAATAACGTGATTGCTCTCCTAACAAAGAGTGAAAAAAAGGTTTACATTACCATTTAACACTT  
TCATAATCACAATTTTATACTACATTATTTTTTTAGAAAATATGATTTTTACTATATTTGAAAATATTTGT  
GATTTTATTTTTAAAGGTTTGTGAGAGTTGAAGAGTTGAGTCCCTATGTGATTAAAAAAGAAGCTTTT  
TGTGTAGTACCGTTGGGGTGCCAACAAGGAGAAAAACAGGTGCGCATCTTGCAATTGCATGGCGAAGA  
AACCCGTGTTTCTCACAACGCTTTCTTCTATCTTTTCACTCTCTTCAAAGGGTTTGGATTTTCTGTA  
ATTTGACGAAACCCCTCTTTGTTCCCTTCTCCATTTTTCTTTTCTGTAATTTTTCACATTTTCTCTC  
CCTCCCTCCTTACATACGTACAAATTTGTTGACAACTTGCTTCTCCTGTCTCTATATGGACTGCCTGCT  
TTACACTTCTAAATCCCAATTTCTCATTGGGTCTTTATTATTATTATTCTTATTGGGATTGACGCTG  
CTGAAG**ATG**

>pS1TPS8

CCTATTATATCCTCAATTAATTATTTTAAAAAGGTAACCTTTTTTTTTTGTCTTATTAAATAGATGTAT  
CAATTCAATAATGGACAAGTAGATTTTCATACTAAAATATGAGTATCTCTTGAGGCGTCGTATTAAAT  
AAATCATGTATCTTCAAATTTCTTTTAATAAATAATTTTATAAAGATTCAATAATAGTAATAACTAAT  
TATTCTTTAATATAAATTTTTTTTATTTTTTTTATTTAAGTTTTGTAAATTTAAAAGTATAAATCTTTCT  
TTTTACAACATATAAATTTATGATGAAGCTTTACATTTTTTATACGGCTGATTATCTACTTTGTTTATT  
AAAGGTTTATCCCAAAATAATAAAATAACAAAAATATAACATTAATCAAATTTAAATTAATGATAA  
TGATGGAGAATTAAAATTCGAGGTGGGCTAGATAGATGAGTAATTTTAGATTAAATCCAGGAATGTGC  
AGTCCGCGCAGCCTTTGAGGCCTTTTAAAAATAGGAATCTGAAAAAATAAAAAATCTGTGTGTCAGCT  
GCATGGCTGTAAGGCTTTATGCACCTTTTAAAGCTTACACGAGGATTCGTCTGCTCTTCCACTTCCCC  
TCTTTAGCTATGATAATAATTCCTCTGCCACCCGGTATTATCGATTTGCTCTCACAATTCATCATCA  
AATGCTACTAATTTTTAATAATTACTCATAATTATTGTTGTGATCAAGCTTTTCCGGCCGGTTATCGA  
TGTTGAGATCAGATTAGGCCAGGAATCCTTCCCCTTGTTTTTTCACATCGGTTTTACAGGTAATTTGAC  
ACAGTCTGGATTTGATTTACCGTGGTTTCTGAAATGGGTAAATTAGCTGTACAGAAATCTCTGTGCC  
TGTGTTCTTTTACAGCTTTCTCAATGAATTCGGGGTTTGGTTTTCTGCATGCAATGTGTTTGTGCCGG  
TGTCCGCTTTGAATCTGATAGCTGTTCTTTTTAATCTGGTGGGTCTTTATATGTTTCACTTGCCTCA  
TTGTATTTTGCTTGAACCTGAACTGGGATACCAATGAATTTATATTTAAAAATCCTGGACAGAAAAAG  
CCAAGACTCTTGGGGTGGTAGACCCCATTTCCCTAGAGAATCTGTGGATCCCATTCTCCACACGTTA  
TCTCTTTCTTAGTTTAAATCCTTTTTCTCTCTAGTACTACTGATTTTCAATAATTTAAGTATTGGAT  
TTATATGGGTCTAAATGGAGTGACATGGTTAGTGAAGTGGTGTTATTGTTGTAGTGGTTTATTCAACT  
AGGATGCTGATGTCCATTTCATTTATGTTAGCCTTGGCTGTGAAATTGCATTTTCACTGTTTGTACTT  
GAGGCTATTGTGGAATTGTATAAGTTTTTATATAATTCACGCGGGAGTTTCATCTTTTGTACCTCTT  
ATTATGAAAGATGGTTGTTTCCAGGGACATCATACTCTATTAAATTCATCATAGGTGGTCTTGTCT  
AGACAG**ATG**

**Supplementary Figure S1.** *S1TPS2* and *S1TPS8* promoter sequences 1.5. kb upstream of the translational start site (bold).

Mollavali and Börnke; Supplementary Table S1.

**Table S1. *TPS/TPP*-genes in tomato (*Solanum lycopersicum*)**

| Family | Gene            | Locus ID       | GenBank<br>No. | Acc. | ORF (bp) | Protein<br>MW KDa | PCR |
|--------|-----------------|----------------|----------------|------|----------|-------------------|-----|
| TPS    | <i>SITPS1</i>   | Solyc01g005210 | XP_004228746   |      | 2574     | 97                | +   |
|        | <i>SITPS2</i>   | Solyc02g071590 | XP_010316884   |      | 2832     | 106               | +   |
|        | <i>SITPS3</i>   | Solyc02g072150 | XP_004233035   |      | 2556     | 96                | +   |
|        | <i>SITPS4</i>   | Solyc04g025940 | XP_004237260   |      | 2574     | 96                | +   |
|        | <i>SITPS5</i>   | Solyc05g005750 | XP_004238680   |      | 2556     | 96                | +   |
|        | <i>SITPS6</i>   | Solyc07g006500 | XP_010323144   |      | 2631     | 96                | +   |
|        | <i>SITPS7</i>   | Solyc07g055300 | XP_004243268   |      | 2577     | 97                | +   |
|        | <i>SITPS8</i>   | Solyc07g062140 | NP_001234879   |      | 2781     | 104               | +   |
|        | <i>SITPS9</i>   | Solyc08g076650 | XP_004245918   |      | 2589     | 97                | +   |
|        | <i>SITPS10</i>  | Solyc10g007950 | XP_004248198   |      | 2574     | 97                | +   |
|        | <i>SITPS11*</i> | Solyc10g046770 | XM_010329326   |      | 735      | 28                | -   |
| TPP    | <i>SITPP1</i>   | Solyc03g007290 | XP_004234173   |      | 1011     | 39                | +   |
|        | <i>SITPP2</i>   | Solyc03g083960 | XP_025885725.1 |      | 1154     | 43                | +   |
|        | <i>SITPP3</i>   | Solyc04g054930 | XP_004237406   |      | 1167     | 44                | +   |
|        | <i>SITPP4</i>   | Solyc04g072920 | XP_004237894   |      | 1098     | 41                | +   |
|        | <i>SITPP5</i>   | Solyc04g082550 | XP_025886308   |      | 882      | 33                | -   |
|        | <i>SITPP6</i>   | Solyc05g051880 | XP_019069377.1 |      | 905      | 34                | -   |
|        | <i>SITPP7</i>   | Solyc06g060600 | XP_004242008   |      | 1020     | 38                | -   |
|        | <i>SITPP8</i>   | Solyc08g079060 | XP_004245739   |      | 1161     | 43                | +   |

Mollavali and Börnke; Supplementary Table 2.

| Supplementary Table 2. Nucleotide sequences of gene-specific primers. |    |                                           |
|-----------------------------------------------------------------------|----|-------------------------------------------|
| Target gene                                                           |    | Primer sequences used for qRT-PCR primers |
| <i>SITPS1</i>                                                         | Fw | 5'-GCTCCAGCAGCCGAAGTCTT-3'                |
|                                                                       | Rv | 5'-CCTGCATCAGCCTAACTATCTC-3'              |
| <i>SITPS2</i>                                                         | Fw | 5'-TCTTTTCCATTATCTCCCACTTCCG -3'          |
|                                                                       | Rv | 5'- GCTGTCTTGGTCCTCTACTCCTTC-3'           |
| <i>SITPS3</i>                                                         | Fw | 5'- CTTCCAGTGAGAGAGGAGAT-3'               |
|                                                                       | Rv | 5'- CATGCGACTACAACAGGATAG-3'              |
| <i>SITPS4</i>                                                         | Fw | 5'- AGAAGCCAAGCAAAGCCAAG-3'               |
|                                                                       | Rv | 5'- AGAAGCATTAGCAAGACCTCCA-3'             |
| <i>SITPS5</i>                                                         | Fw | 5'- AAAGCCAAGCAAAGCCAAGTA-3               |
|                                                                       | Rv | 5'- GACAGGACGCATTACCAAGAC-3'              |
| <i>SITPS6</i>                                                         | Fw | 5'- TTCAGCAGCTTCTACAGCAATG-3'             |
|                                                                       | Rv | 5'- CTAGGGAGAGATCTTCGACAGA-3'             |
| <i>SITPS7</i>                                                         | Fw | 5'- ACACATCTGAGGTGGTGCTTAT-3'             |
|                                                                       | Rv | 5'- GGAGTCCGCAGGTTTCATCGT-3               |
| <i>SITPS8</i>                                                         | Fw | 5'- GTGTCATGGAATGTGCTGGAT-3'              |
|                                                                       | Rv | 5'- TGGCGTACTGAGCAGATACC-3                |
| <i>SITPS9</i>                                                         | Fw | 5'- GGCCAGAAACCAAGCAAGG-3'                |
|                                                                       | Rv | 5'- CTCAGAAGCAGAAGCCAGG-3'                |
| <i>SITPS10</i>                                                        | Fw | 5'- TCGGTGATGCTTTATCCAGAAA-3'             |
|                                                                       | Rv | 5'- AACCTCTGAAGTGTCTGTCCTCAA-3'           |
| <i>SITPS11</i>                                                        | Fw | 5'- TGTGGTTTACAACAATAGGGTGG-3'            |
|                                                                       | Rv | 5'- TGTCTAGAATCGATTATGTCCGG-3'            |
| <i>SITPP1</i>                                                         | Fw | 5'- TGAACGTGCCTTCATGTC-3'                 |
|                                                                       | Rv | 5'- CTGTCGACTTCTTCCACTTATT-3'             |
| <i>SITPP2</i>                                                         | Fw | 5'- AGGAGATGATCGTACAGATGAA-3'             |
|                                                                       | Rv | 5'- GATCCCTCAGAGAGTAGAATGC-3'             |
| <i>SITPP3</i>                                                         | Fw | 5'- CTGAGGTTATGGTGTCTTCTACG-3'            |
|                                                                       | Rv | 5'- GTTCCTTAGAGATGCTTTCATC-3'             |
| <i>SITPP4</i>                                                         | Fw | 5'- AGGCTTTGGAATATTAGTGTCC-3'             |
|                                                                       | Rv | 5'- CCACTCCACCAAACGATTCAAA-3'             |
| <i>SITPP5</i>                                                         | Fw | 5'- GAGAATGGTGCTAGGTGAAG-3'               |
|                                                                       | Rv | 5'- CGATTTCTACAGCTATTATCAGTGGACGA-3'      |
| <i>SITPP6</i>                                                         | Fw | 5'- GACTATGATGGTACCCTTTCTC-3'             |
|                                                                       | Rv | 5'- TGCACCTCCCACTAACTAT-3'                |
| <i>SITPP7</i>                                                         | Fw | 5'- CGTGATAGACTGGGACAAAG-3'               |
|                                                                       | Rv | 5'- CTGTTCTGTCATCGCCAATA-3'               |
| <i>SITPP8</i>                                                         | Fw | 5'- GTGGGAGAAGACGTGATAAG-3'               |
|                                                                       | Rv | 5'- GCAGACGATGTATTCTTGATTG-3'             |
| <i>SITRE1</i>                                                         | Fw | 5'- ACGGGTTTCGGATGGTCAAA-3'               |
|                                                                       | Rv | 5'- GCAGTCATTCTTCAAATCTTCG-3'             |
| <i>Ubiquitin</i>                                                      | Fw | 5'- TCGTAAGGAGTCCCCTAATGCTGA-3'           |
|                                                                       | Rv | 5'- CAATCGCCTCCAGCCTTGTGTAA-3'            |
|                                                                       |    |                                           |
|                                                                       |    | Primer sequences used for cloning         |
| <i>SITPS1</i>                                                         | Fw | 5'-GTCGACACAAATGGTGTCAAGATCCTATTC-3'      |
|                                                                       | Rv | 5'-TCTAGACATCTGTGGTAACATTTGGTC-3'         |
| <i>SITPS2</i>                                                         | Fw | 5'-GGATCCACAAATGGAGTCGATTGAAGATAC-3'      |
|                                                                       | Rv | 5'-AAGCTTGCAAGATGAATTATTGGCC-3'           |

|                       |    |                                                                          |
|-----------------------|----|--------------------------------------------------------------------------|
| <i>SITPS3</i>         | Fw | 5'-GTCGACACAAATGATGTCCAAATCTTATAC-3'                                     |
|                       | Rv | 5'-TCTAGATGTTACAATTTCTGATGGAGG-3'                                        |
| <i>SITPS4</i>         | Fw | 5'-GGATCCACAAATGGCATCAAGATCTAG-3'                                        |
|                       | Rv | 5'-CTCGAGAATAACAGAACCAAAGGC-3'                                           |
| <i>SITPS5</i>         | Fw | 5'-GGATCCACAAATGCCATCAAGATCTTG-3'                                        |
|                       | Rv | 5'-CTCGAGCAGAACAGAGTCCAATGC-3'                                           |
| <i>SITPS6</i>         | Fw | 5'-GGATCCACAAATGTTGATGAATGTTCCAGG-3'                                     |
|                       | Rv | 5'-GTCGACTACAAAGGATGCATGATTC-3'                                          |
| <i>SITPS7</i>         | Fw | 5'-GGATCCACAAATGATGTCTAGATCGTATAC-3'                                     |
|                       | Rv | 5'-CTCGAGGTCCGAGTCCGCAGGTTTC-3'                                          |
| <i>SITPS8</i>         | Fw | 5'-GGATCCACAAATGCCAGGGAACAAGTATAC-3'                                     |
|                       | Rv | 5'-GTCGACTGATGTCCCATTTGAAATAG-3'                                         |
| <i>SITPS9</i>         | Fw | 5'-GTCGACACAAATGGTTTTCAAGGTCATATTC-3'                                    |
|                       | Rv | 5'-CTCGAGTTCTCGGTCAATGATTACGC-3'                                         |
| <i>SITPS10</i>        | Fw | 5'-GGATCCACAAATGATTTTCGAGATCGTATAC-3'                                    |
|                       | Rv | 5'-CTCGAGAGCCGAGTCCTCAGCTTC-3'                                           |
| <i>SITPP1</i>         | Fw | 5'-GGATCCACAAATGAGAGAAAATTTGACAAG-3'                                     |
|                       | Rv | 5'-GAATTCACCCGCGGAAACCTCCCC-3'                                           |
| <i>SITPP2</i>         | Fw | 5'-AAGCTTACAAATGGACCTGAAATCAAATAC-3'                                     |
|                       | Rv | 5'-GTCGACTACCTCCGATGGATCCCTC-3'                                          |
| <i>SITPP3</i>         | Fw | 5'-GATATCACAAATGACTCAGCAGAATG-3'                                         |
|                       | Rv | 5'-CTCGAGGTTCTTAGAGATGCTTTC-3'                                           |
| <i>SITPP4</i>         | Fw | 5'-GGATCCACAAATGACTAATCAGAATG-3'                                         |
|                       | Rv | 5'-AAGCTTTTTCTTCTGATATTTTG-3'                                            |
| <i>SITPP8</i>         | Fw | 5'-GGATCCACAAATGGACTTGAATTCG-3'                                          |
|                       | Rv | 5'-GATATCTATATCATCATCTTCAAC-3'                                           |
|                       |    |                                                                          |
|                       |    | <b>Primer sequences used for construction of <i>GUS::ProSITPS2,8</i></b> |
| <i>ProSITPS2::GUS</i> | Fw | 5'-GGTTGAGAACTGTCGAGATGTTAGC-3'                                          |
|                       | Rv | 5'-CTTCAGCAGCGTCAATCCC-3'                                                |
| <i>ProSITPS8::GUS</i> | Fw | 5'-GATGTATCAATTCAATAATGGAC-3'                                            |
|                       | Rv | 3'-CTAGAACAAGACCACCTATGATG-3'                                            |
